# Supplementary material for: Filling Polyoxoanions into MIL-101(Fe) for Adsorption of Organic Pollutants with Facile and Complete Visible Light Photocatalytic Decomposition
Source: MDPI journal article supplement (doi:10.3390/molecules27113404), 2022-05-25
Supplement: s1 [file s1]

# **Filling Polyoxoanions into MIL-101(Fe) for Adsorption of Organic Pollutants with Facile and Complete Visible Light Photocatalytic Decomposition**

Qing Lan<sup>a</sup>, Sujuan Jin<sup>a</sup>, Bohan Yang<sup>a</sup>, Zhi-Ming Zhang<sup>b</sup>, Xuyang Li<sup>a</sup>, Haiquan Xie<sup>a,\*</sup>, Xiaoli Jin<sup>a</sup>, Huan Zhang<sup>c,\*</sup>, Qiang Zhao<sup>a</sup>

<sup>a</sup>*Engineering Technology Research Center of Henan Province for Solar Catalysis, College of Chemistry and Pharmaceutical Engineering, Nanyang Normal University, Nanyang 473061, China;*

<sup>b</sup>*Institute of New Energy Materials & Low Carbon Technology, School of Materials Science & Engineering, Tianjin University of Technology, Tianjin 300384, China;*

<sup>c</sup>*School of Science, Tianjin University of Science & Technology, Tianjin 300457, China.*

**\*Corresponding author:**

*E-mail address: Xie-hq@163.com (X. H. Q.), zhanghuan50423@163.com (H. Z.).*

# 1. Experiments

## 1.1 Materials and methods

All the raw chemicals were obtained commercially and used without further purification. The  $\text{H}_3\text{PMo}_{12}\text{O}_{40}$ ,  $\text{H}_4\text{PMo}_{11}\text{VO}_{40}$ ,  $\text{H}_5\text{PMo}_{10}\text{V}_2\text{O}_{40}$ , and MIL-101 were prepared according to literature procedures, and identified by using IR spectroscopy. The powder X-ray diffraction (XRD) pattern was collected by using a Rigaku D/max-2550 diffractometer with  $\text{Cu}_{\text{K}\alpha}$  radiation in the angular range  $2\theta$   $5^\circ$ - $50^\circ$  at 293K. FTIR spectra were recorded on an Alpha Centaur FT/IR spectrophotometer with KBr pellets in the range of  $400$ - $4000\text{ cm}^{-1}$  at room temperature. The thermogravimetric analysis (TGA) was performed on a Perkin-Elmer TGA7 instrument in flowing  $\text{N}_2$  with a heating rate of  $10\text{ }^\circ\text{C}\cdot\text{min}^{-1}$ . Nitrogen adsorption-desorption isotherms was tested by using a Micrometrics ASAP-2020 Mautomatic specific surface area and porous physical adsorption analyzer at 77 K. UV-Vis absorption spectra were determined on a 756 CRT UV-Vis spectrophotometer.

## 1.2 Fabrication of MIL-101(Fe)

$\text{FeCl}_3\cdot 6\text{H}_2\text{O}$  (1.33 g, 4.90 mmol) was dissolved in DMF (50 mL),  $\text{H}_2\text{bdc}$  (0.41 g, 2.48 mmol) was added to this brown solution and stirred at room temperature for 10 min. The resulting mixture was divided into 10 portions and transferred into a 20 mL teflon lined autoclave and heated at 383K for 24 h. After cooling slowly to ambient temperature, the brown powder was centrifugal separation, and thorough washed with distilled water and DMF. The products were dried at 353 K under vacuum.

## 1.3 Synthesis of composite POM@MIL-101(Fe)

The composite POM@MIL-101 was synthesized by adding 0.2 g POM ( $\text{H}_3\text{PMo}_{12}\text{O}_{40}$ ,  $\text{H}_4\text{PMo}_{11}\text{VO}_{40}$  or  $\text{H}_5\text{PMo}_{10}\text{V}_2\text{O}_{40}$ ) into the mixture of MOF precursors, which was stirred for 0.5 h. The following experimental procedure is identical with that of MIL-101(Fe).

## 2. Spectral data

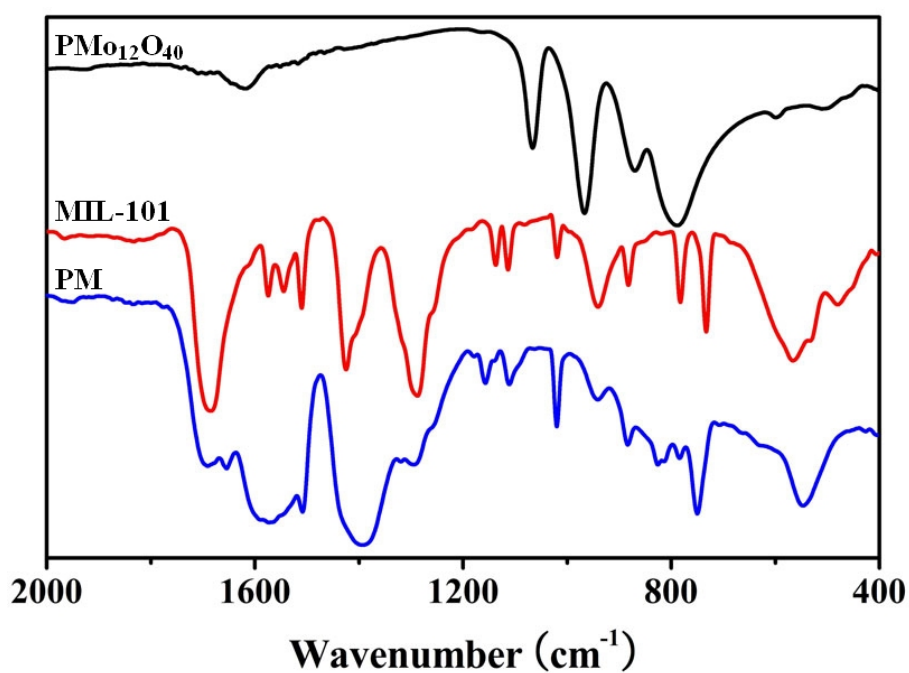

Figure S1 FT-IR spectra of  $\text{PMo}_{12}\text{O}_{40}$ , MIL-101 and PM.

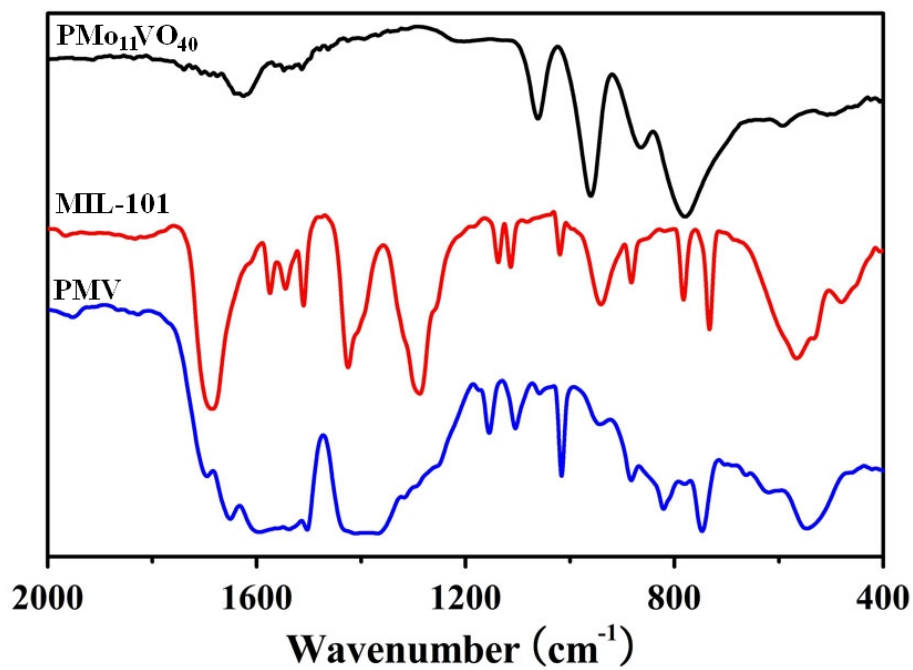

Figure S2 FT-IR spectra of  $\text{PMo}_{11}\text{VO}_{40}$ , MIL-101 and PMV.

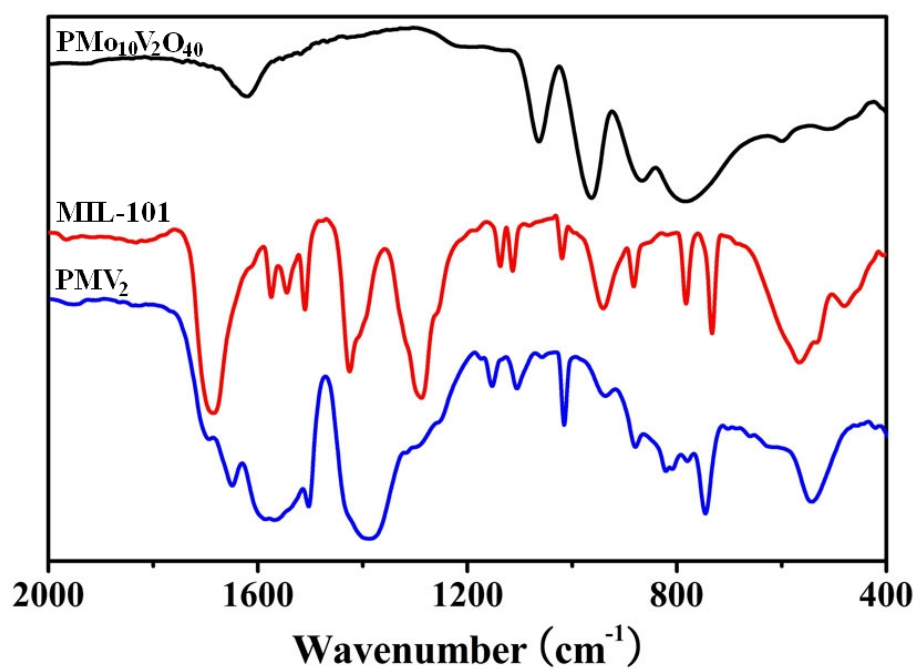

**Figure S3** FT-IR spectra of  $\text{PMo}_{10}\text{V}_2\text{O}_{40}$ , MIL-101, and  $\text{PMV}_2$ .

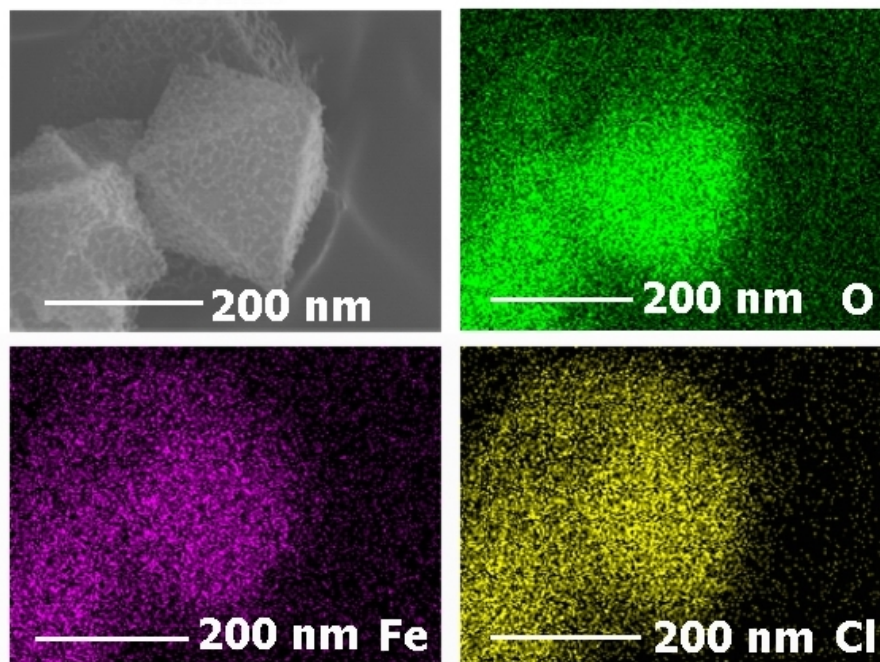

**Figure S4** Elemental mapping images of MIL-101(Fe).

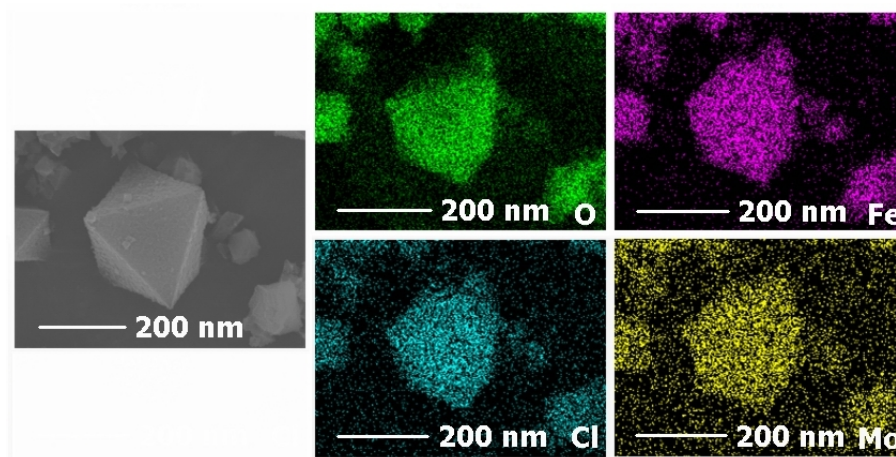

**Figure S5** Elemental mapping images of PM.

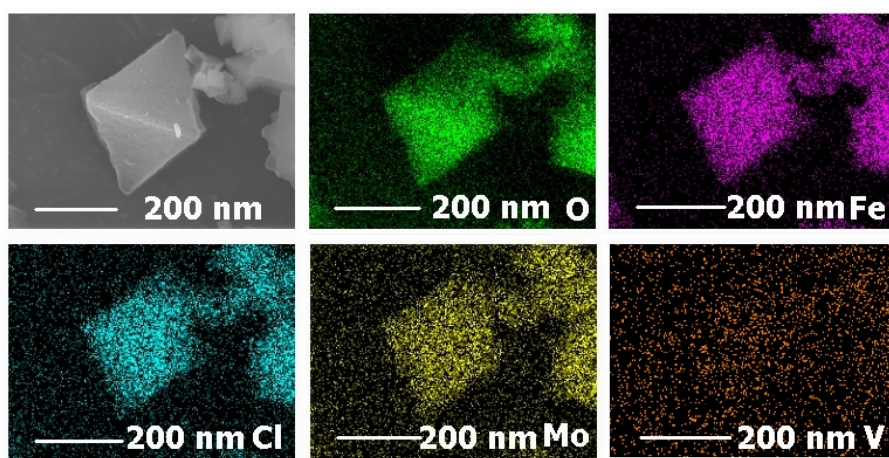

**Figure S6** Elemental mapping images of PMV.

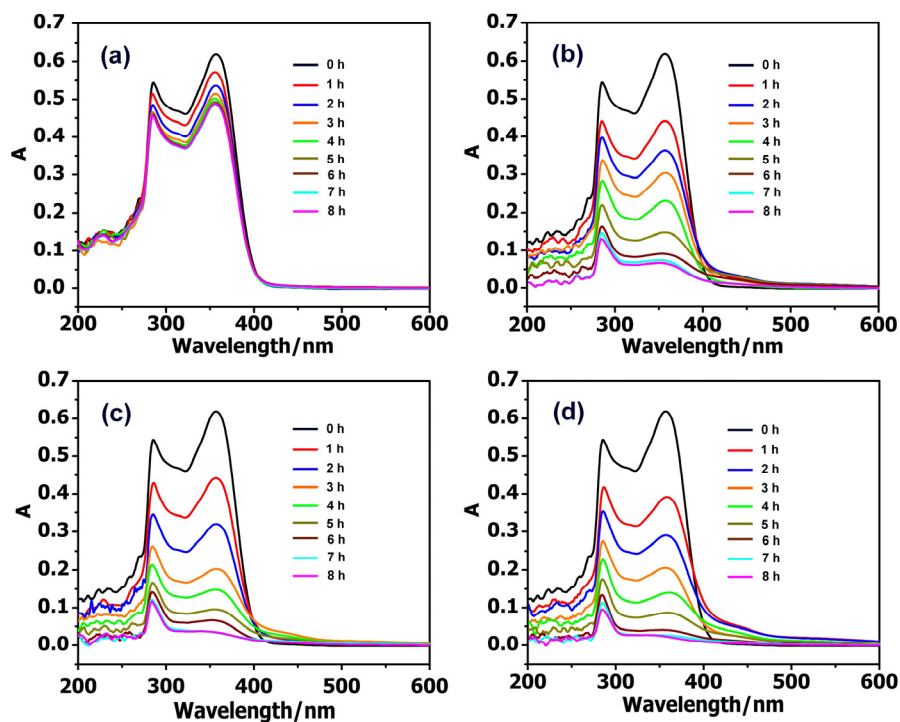

**Figure S7** The UV-Vis spectra of 20 mg·L<sup>-1</sup> TC during the adsorption with 2 mg MIL-101 (a); PM (b); PMV (c); and PMV<sub>2</sub> (d).

**Table S1.** Adsorption capacity of TC with the reported and commercial adsorbents.

| Absorbent                                          | q <sub>max</sub> (mg·g <sup>-1</sup> ) | Time (h) | References |
|----------------------------------------------------|----------------------------------------|----------|------------|
| Graphene oxide                                     | 313                                    | 2.5      | 18         |
| Smectite                                           | 462                                    | 2        | 19         |
| H <sub>3</sub> PO <sub>4</sub> -activated carbon   | 308                                    | 24       | 20         |
| Fe modified zeolite                                | 200                                    | 6.5      | 21         |
| UiO-66                                             | 23.1                                   | 6        | 22         |
| C <sub>3</sub> N <sub>4</sub> -ZIF-8(ZC) composite | 420                                    | 3        | 23         |
| PM                                                 | 647.6                                  | 8        | This work  |
| PMV                                                | 748.9                                  | 8        | This work  |
| PMV <sub>2</sub>                                   | 839.5                                  | 8        | This work  |

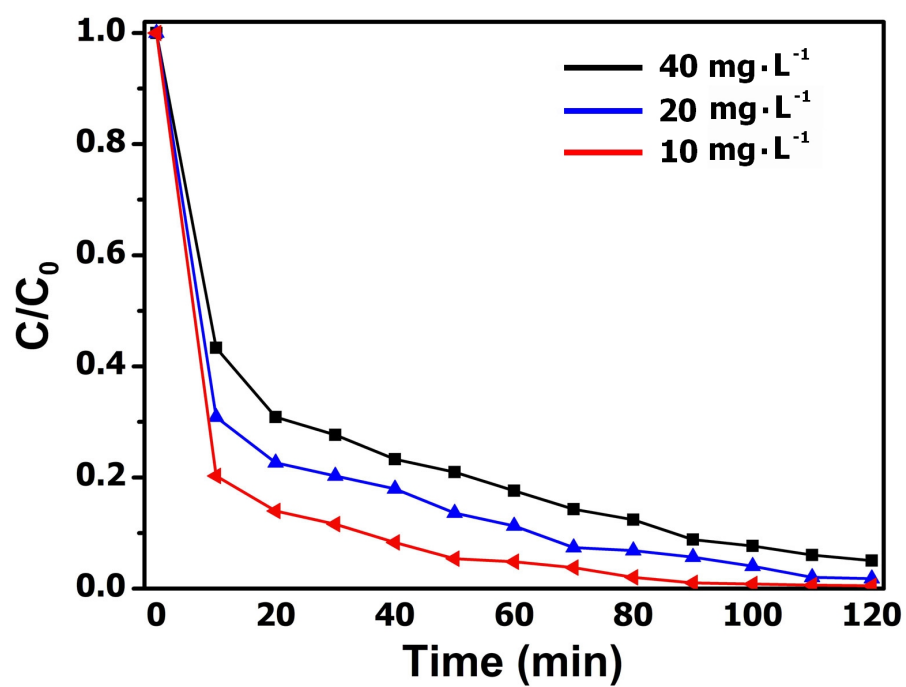

**Figure S8** The UV-Vis spectra of 40-10  $\text{mg} \cdot \text{L}^{-1}$  TC during the photocatalytic degradation with  $\text{PMV}_2$ .



### 3. Stability

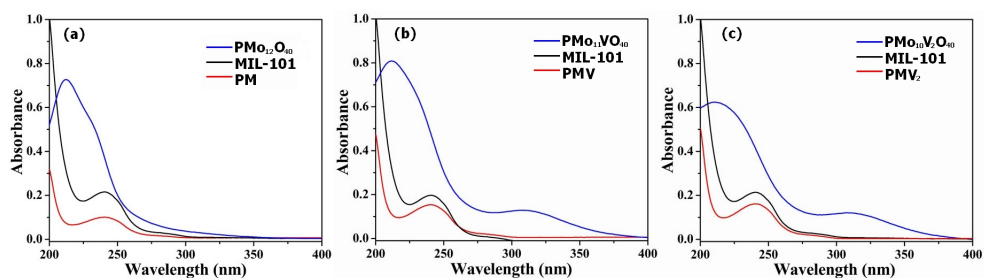

**Figure S9** UV-vis spectra of (a) PMo<sub>12</sub>O<sub>40</sub>, MIL-101 and the PM solution, (b) PMo<sub>11</sub>VO<sub>40</sub>, MIL-101 and PMV solution, (c) PMo<sub>10</sub>V<sub>2</sub>O<sub>40</sub>, MIL-101 and the PMV<sub>2</sub> solution obtained by the centrifugation. Materials (1 mg) were immersed in 20 mL H<sub>2</sub>O. After 1 day, the materials were isolated by centrifugation. The resulting solutions were measured by UV-vis spectroscopy.

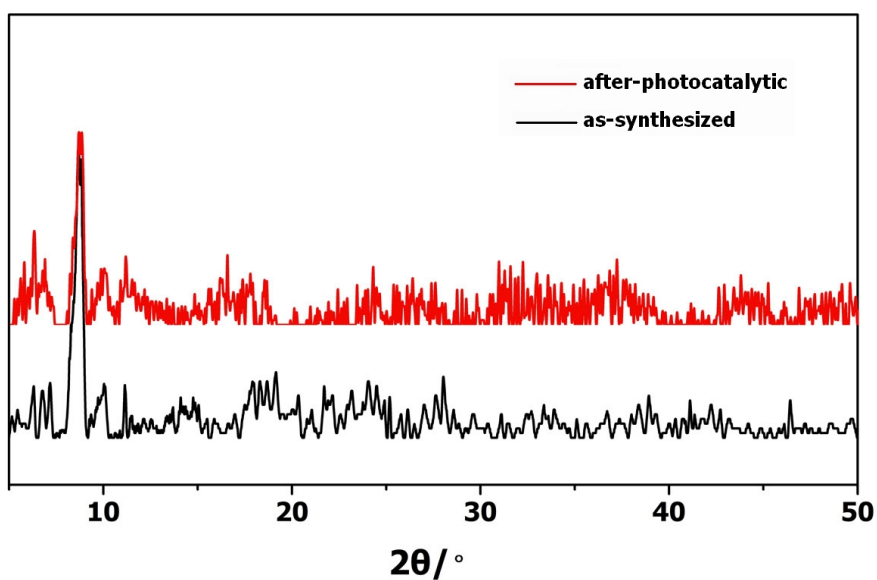

**Figure S10** XRD patterns of PMV<sub>2</sub>.

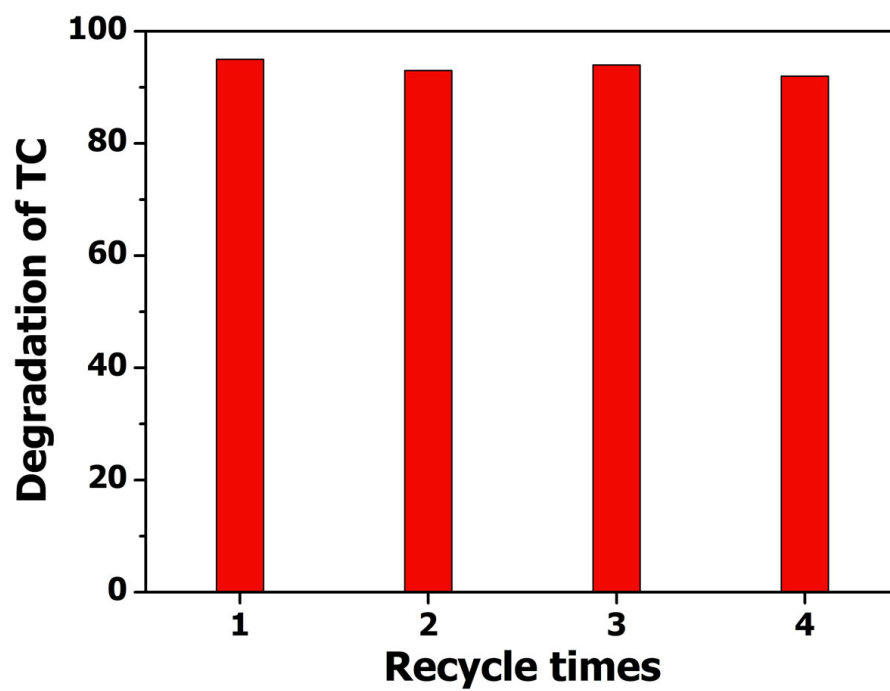

**Figure S11** Four cycles for degradation of TC with PMV<sub>2</sub>.

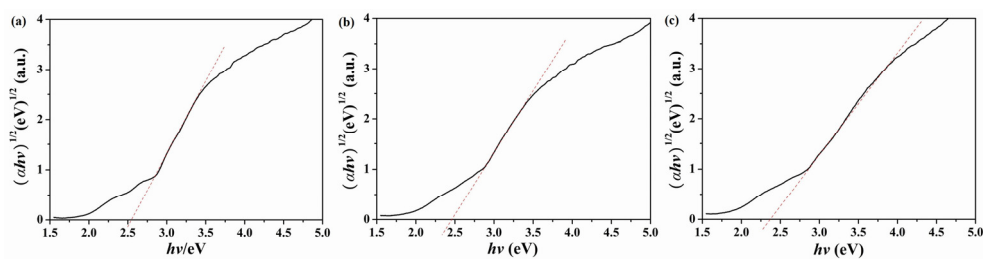

**Figure S12** The estimated band gaps of the prepared PM, PMV and PMV<sub>2</sub> photocatalyst.
